# Supplementary material for: Mitochondrial and Cellular Function in Fibroblasts, Induced Neurons, and Astrocytes Derived from Case Study Patients: Insights into Major Depression as a Mitochondria-Associated Disease
Source: MDPI journal article supplement (doi:10.3390/ijms25020963), 2024-01-12
Supplement: s1 [file s1]

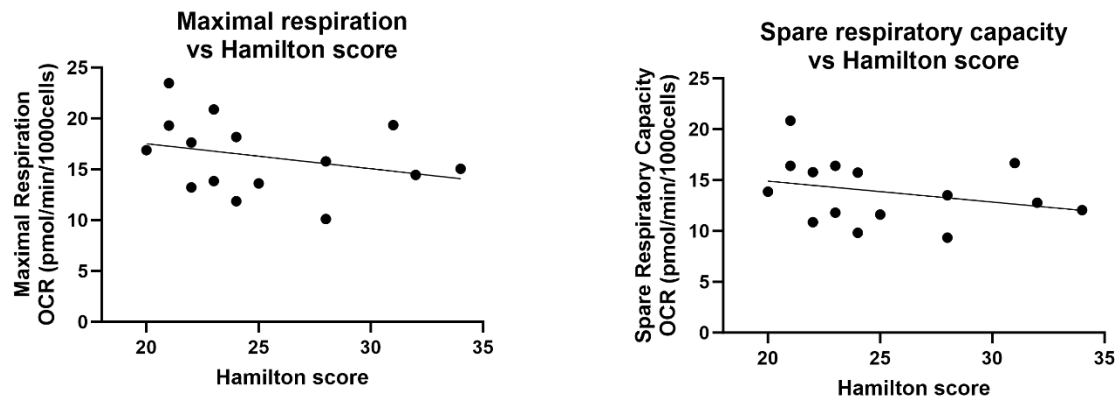

**Figure S1. Significant correlations between depression severity and biological findings.** Graphs represent Spearman correlation between respiratory data in the patients with MDD cohort ( $n = 16$ ) and a simple linear regression. P-values are presented in Table S2.

### Spontaneous Ca<sup>2+</sup> transients

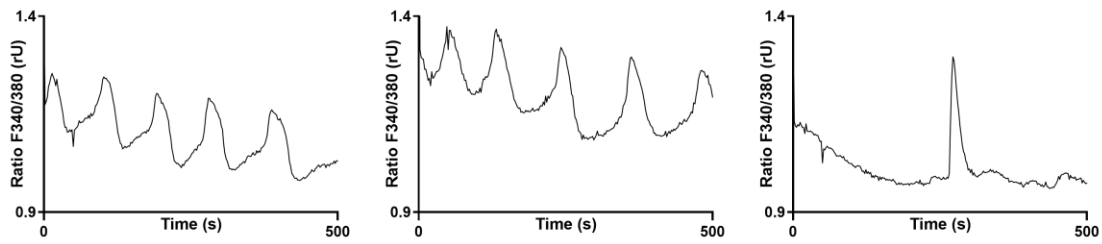

### ATP-responsive Ca<sup>2+</sup> transients

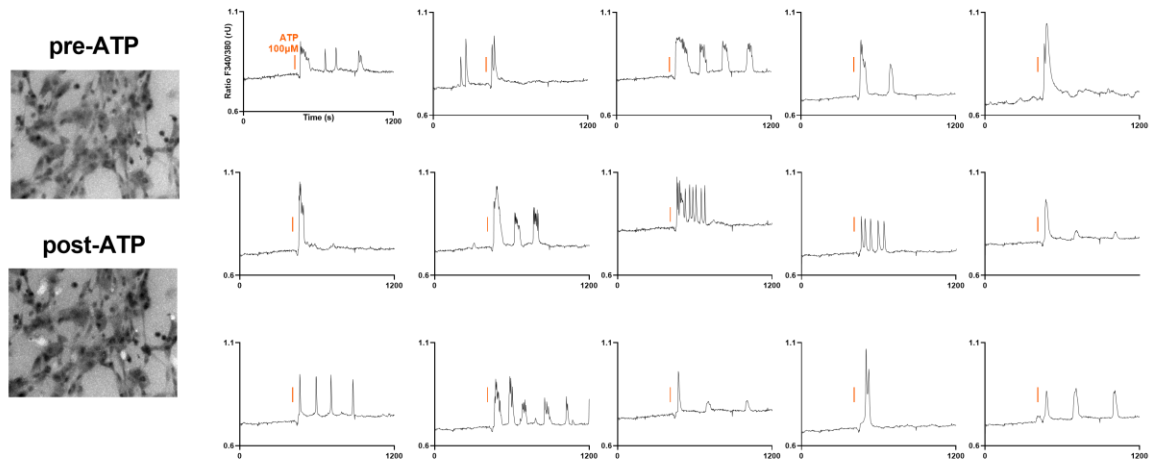

**Figure S2. Calcium transients in astrocytes.** Example spontaneous calcium transients in astrocytes loaded with Fura-2/AM. Curves show Fura ratio F340/380 nm in relative units (up). Example ATP-responsive calcium transients in astrocytes loaded with Fura-2/AM. ATP was added to a final concentration of 100μM. On the left, example Fura ratio images showing brighter cells post-ATP. Curves show Fura ratio F340/380 nm in relative units (down)

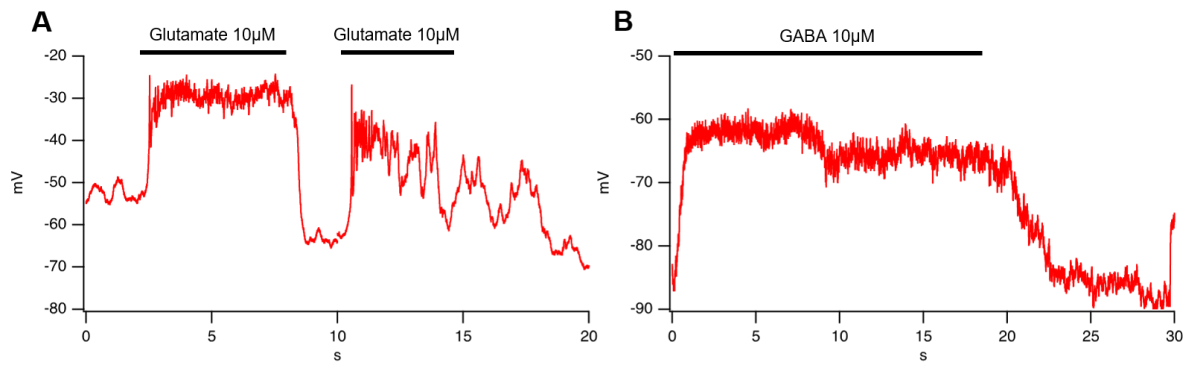

**Figure S3. Glutamate and GABA response in current-clamp.** Neurons were recorded in whole-cell patch clamp, in current clamp mode without injection of current. Membrane potential was measured while applying 10  $\mu$ M glutamate (**A**) or  $\gamma$ -Aminobutyric acid (GABA) (**B**) using a micro-perfusion system. Bars represent application duration. Note that the direction of GABA response results from a symmetrical chloride concentration in the bath and pipette solutions.

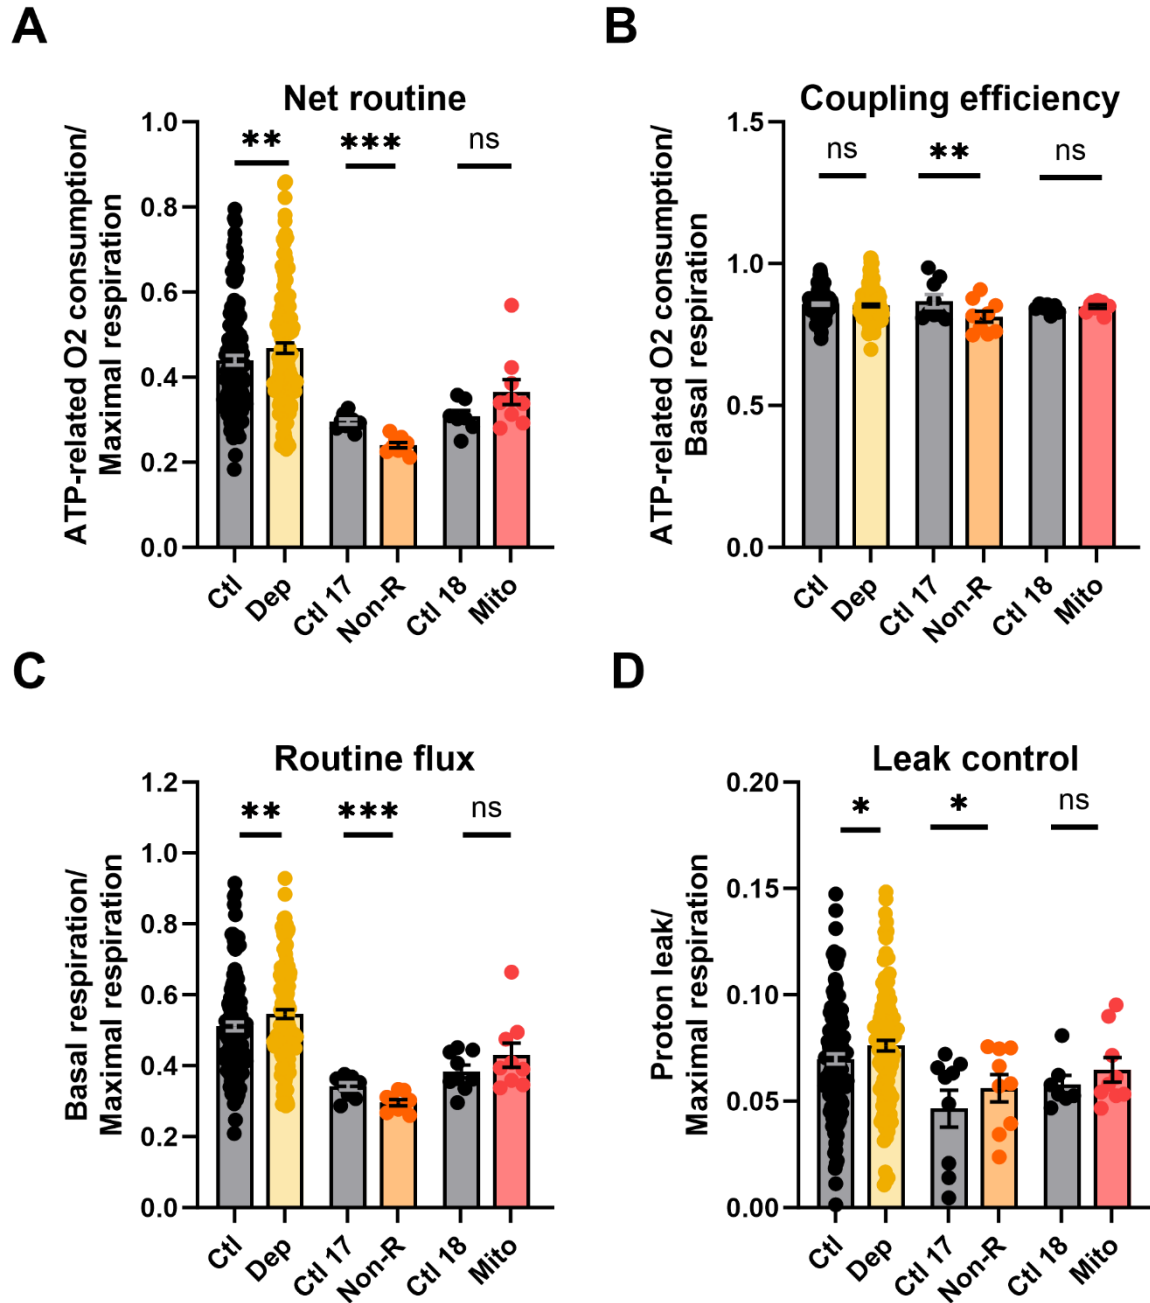

**Figure S4. Mitochondrial flux ratios in fibroblasts.** (A) **Net routine** is the ratio between ATP-related O<sub>2</sub> consumption and maximal respiration (B) **Coupling efficiency** is the ration between ATP-related O<sub>2</sub> consumption and basal respiration (C) **Routine flux** is the ratio between basal and maximal respiration (D) **Leak control** is the ratio between proton leak and maximal respiration. Dot plots show the respective ratios  $\pm$  SEM Ctl: non-depressed controls cohort; MDD: major depressive disorder cohort; Ctl 17 and Ctl 18: non-depressed controls; Non-R: non-responder patient; Mito: mitochondriopathy patient. All data were analyzed with paired t-test, significant differences were indicated with \* ( $p < 0.05$ ), \*\* ( $p < 0.005$ ), \*\*\* ( $p < 0.0005$ )

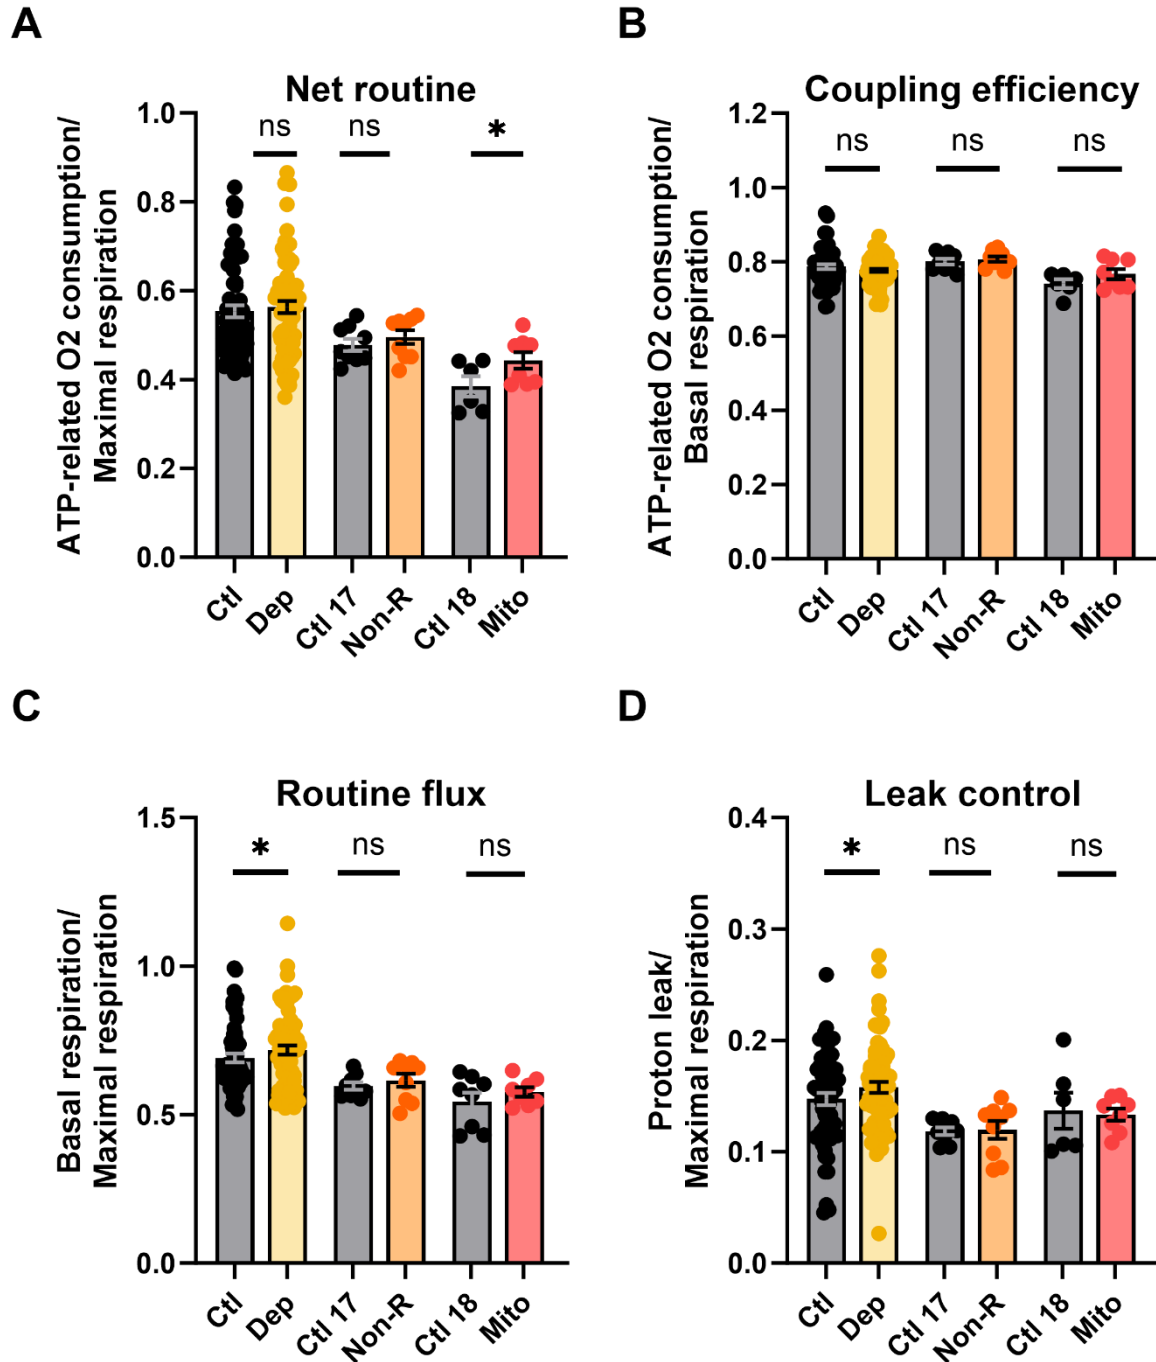

**Figure S5. Mitochondrial flux ratios in NPCs.** (A) **Net routine** is the ratio between ATP-related O<sub>2</sub> consumption and maximal respiration (B) **Coupling efficiency** is the ration between ATP-related O<sub>2</sub> consumption and basal respiration (C) **Routine flux** is the ratio between basal and maximal respiration (D) **Leak control** is the ratio between proton leak and maximal respiration. Dot plots show the respective ratios  $\pm$  SEM Ctl: non-depressed controls cohort; MDD: major depressive disorder cohort; Ctl 17 and Ctl 18: non-depressed controls; Non-R: non-responder patient; Mito: mitochondriopathy patient. All data were analyzed with paired t-test, significant differences were indicated with \* ( $p < 0.05$ ), \*\* ( $p < 0.005$ ), \*\*\* ( $p < 0.0005$ )

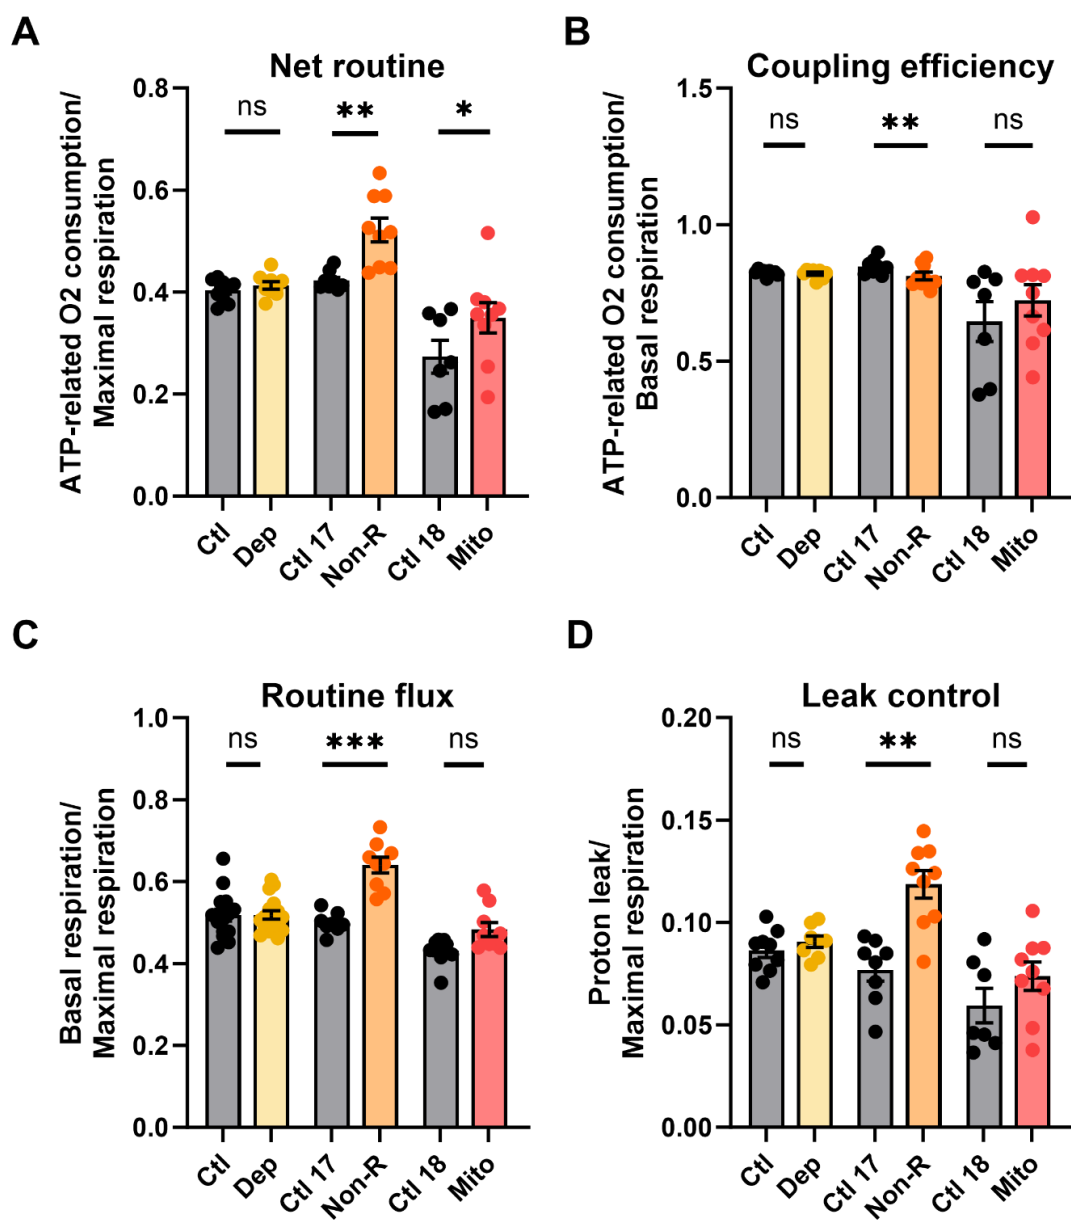

**Figure S6. Mitochondrial flux ratios in astrocytes.** (A) **Net routine** is the ratio between ATP-related O<sub>2</sub> consumption and maximal respiration (B) **Coupling efficiency** is the ration between ATP-related O<sub>2</sub> consumption and basal respiration (C) **Routine flux** is the ratio between basal and maximal respiration (D) **Leak control** is the ratio between proton leak and maximal respiration. Dot plots show the respective ratios  $\pm$  SEM Ctl: non-depressed controls cohort; MDD: major depressive disorder cohort; Ctl 17 and Ctl 18: non-depressed controls; Non-R: non-responder patient; Mito: mitochondriopathy patient. All data were analyzed with paired t-test, significant differences were indicated with \* ( $p < 0.05$ ), \*\* ( $p < 0.005$ ), \*\*\* ( $p < 0.0005$ )

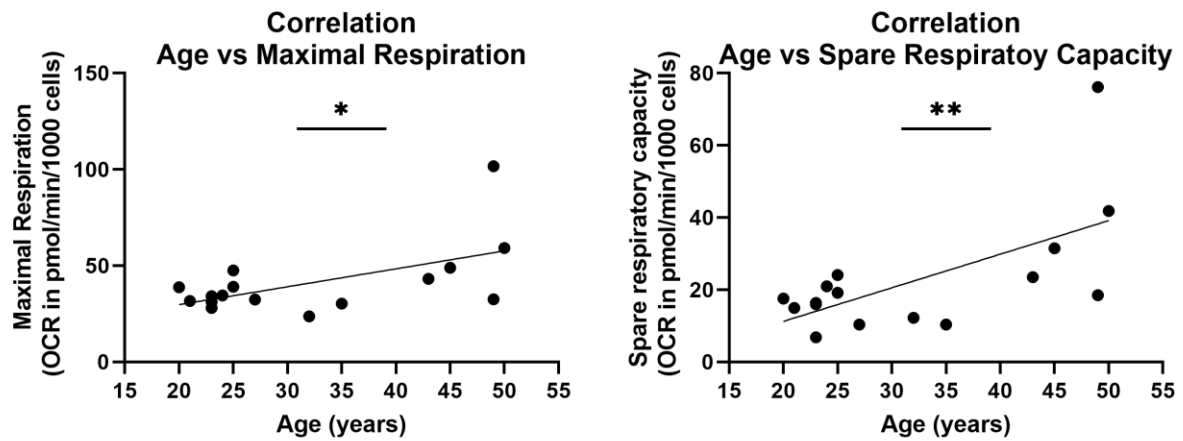

**Figure S7. Correlation between age and mitochondrial respiration.** Graphs represent Pearson correlation between respiratory data in the non-depressed control cohort ( $n = 16$ ) and a simple linear regression. Maximal respiration vs age  $p = 0.0223$ , Spare Respiratory Capacity vs age  $p = 0.0093$ .

Each dot on the graphs represents an individual. Significant differences were indicated with \* ( $p < 0.05$ ).

**Table S1. Mitochondrial bioenergetics in fibroblasts**

|                                                                       | Ctl                  | MDD                 | Ctl 17            | Non-R             | Ctl 18             | Mito               |
|-----------------------------------------------------------------------|----------------------|---------------------|-------------------|-------------------|--------------------|--------------------|
| <b>Basal respiration</b><br>(pmol/min/1000 cells)                     | 18.45±0.47<br>n=140  | 15.81±0.41<br>n=140 | 15.17±0.54<br>n=9 | 19.81±1.04<br>n=9 | 15.20±0.58<br>n=9  | 13.69±0.75<br>n=9  |
|                                                                       | p<0.0001             |                     | p=0.039           |                   | p=0.1393           |                    |
| <b>Maximal respiration</b><br>(pmol/min/1000 cells)                   | 36.28±1.11<br>n=140  | 29.57±0.82<br>n=140 | 44.46±1.26<br>n=9 | 67.34±3.77<br>n=9 | 40.20±2.17<br>n=9  | 32.36±1.17<br>n=9  |
|                                                                       | p<0.0001             |                     | p=0.0006          |                   | p=0.0053           |                    |
| <b>Proton leak</b><br>(pmol/min/1000 cells)                           | 2.65±0.10<br>n=140   | 2.34±0.09<br>n=140  | 2.07±0.39<br>n=9  | 3.67±0.38<br>n=9  | 2.43±0.14<br>n=9   | 2.07±0.15<br>n=9   |
|                                                                       | p=0.0014             |                     | p=0.0004          |                   | p=0.1125           |                    |
| <b>ATP-related O<sub>2</sub> consumption</b><br>(pmol/min/1000 cells) | 15.77±0.41<br>n=140  | 13.25±0.31<br>n=140 | 13.10±0.31<br>n=9 | 16.14±0.98<br>n=9 | 12.98±0.60<br>n=9  | 11.62±0.63<br>n=9  |
|                                                                       | p<0.0001             |                     | p=0.0178          |                   | p=0.0486           |                    |
| <b>Spare respiratory capacity</b><br>(pmol/min/1000 cells)            | 19.09±0.94<br>n=140  | 13.93±0.65<br>n=140 | 29.29±1.05<br>n=9 | 47.52±2.96<br>n=9 | 25.00±1.91<br>n=9  | 18.67±1.55<br>n=9  |
|                                                                       | p<0.0001             |                     | p=0.0004          |                   | p=0.0035           |                    |
| <b>Non-mito. O<sub>2</sub> consumption</b><br>(pmol/min/1000 cells)   | 9.54±0.38<br>n=140   | 7.93±0.28<br>n=140  | 7.06±0.21<br>n=9  | 8.61±0.99<br>n=9  | 7.46±0.24<br>n=9   | 6.57±0.26<br>n=9   |
|                                                                       | p<0.0001             |                     | p=0.1418          |                   | p=0.0315           |                    |
| <b>ATP content</b><br>(nM/μg/mL)                                      |                      |                     | 29.98±2.78<br>n=8 | 26.44±4.34<br>n=8 | 21.82±1.03<br>n=6  | 17.95±1.81<br>n=6  |
|                                                                       |                      |                     | p=0.5998          |                   | p=0.0895           |                    |
| <b>NAD/NADH</b><br>(ratio)                                            |                      |                     | 7.89±0.80<br>n=9  | 7.15±0.95<br>n=8  | 7.37±0.79<br>n=8   | 6.80±0.65<br>n=9   |
|                                                                       |                      |                     | p=0.7491          |                   | p=0.4185           |                    |
| <b>Mitochondrial content</b><br>(mean fluo.)                          |                      |                     | 5942±348<br>n=4   | 8572±1212<br>n=4  | 5990±965<br>n=4    | 6808±1312<br>n=4   |
|                                                                       |                      |                     | p=0.0792          |                   | p=0.1948           |                    |
| <b>MMP</b><br>(relative units)                                        | 1.55 ±0.01<br>n=3971 | 1.37±0.01<br>n=3718 | 1.45±0.07<br>n=92 | 1.39±0.10<br>n=93 | 2.25±0.07<br>n=148 | 2.01±0.05<br>n=142 |
|                                                                       | p<0.0001             |                     | p=0.2982          |                   | p<0.0001           |                    |
| <b>Cytosolic Ca<sup>2+</sup></b><br>(relative units)                  | 0.59±0.01<br>n=1020  | 0.59±0.01<br>n=1114 | 0.62±0.01<br>n=86 | 0.63±0.01<br>n=93 | 0.62±0.01<br>n=108 | 0.60±0.01<br>n=87  |
|                                                                       | p=0.1897             |                     | p=0.1037          |                   | p=0.3228           |                    |



|                                                               |                   |                   |                   |                    |                   |                   |
|---------------------------------------------------------------|-------------------|-------------------|-------------------|--------------------|-------------------|-------------------|
| <b>Mito. Ca2+</b><br>(relative units)                         |                   |                   | 257.4±5.1<br>n=93 | 337.2±5.8<br>n=100 | 253.6±5.2<br>n=99 | 241.1±3.8<br>n=93 |
|                                                               |                   |                   | p<0.0001          |                    | p=0.3904          |                   |
| <b>Cell size</b><br>(pixels)                                  | 2318±27<br>n=1063 | 1975±22<br>n=1105 | 2806±101<br>n=80  | 2124±102<br>n=87   | 2660±94<br>n=94   | 2301±82<br>n=83   |
|                                                               | p<0.0001          |                   | p<0.0001          |                    | p=0.0238          |                   |
| <b>Cytosolic ROS</b><br>(mean fluo.)                          |                   |                   | 21111±4644<br>n=3 | 17900±4366<br>n=3  | 13811±2288<br>n=3 | 16434±4417<br>n=3 |
|                                                               |                   |                   | p=0.5304          |                    | p=0.1791          |                   |
| <b>Mitochondrial ROS</b><br>(mean fluo.)                      |                   |                   | 2063±401<br>n=5   | 3321±215<br>n=5    | 2107±252<br>n=5   | 1993±247<br>n=5   |
|                                                               |                   |                   | p=0.0074          |                    | p=0.7043          |                   |
| <b>Lipid peroxidation</b><br>(pg/mL 8-isoprostane/1000 cells) |                   |                   | 0.30±0.04<br>n=9  | 0.23±0.03<br>n=9   | 0.18±0.01<br>n=9  | 0.27±0.03<br>n=9  |
|                                                               |                   |                   | p=0.1037          |                    | p=0.0033          |                   |
| <b>Glutathione</b><br>(GSH/GSSG ratio)                        |                   |                   | 22.9±3.31<br>n=3  | 24.5±3.78<br>n=3   | 22.1±1.98<br>n=3  | 13.1±1.21<br>n=3  |
|                                                               |                   |                   | p=0.7644          |                    | p=0.0285          |                   |

**Table S2. Correlations between depression severity and biological findings**

|                                   | Non-Mito.<br>O <sub>2</sub><br>Consumption | Basal<br>Respiration | Maximal<br>Respiration | Proton<br>Leak     | ATP -<br>related O <sub>2</sub><br>Consumption | Spare<br>Respiratory<br>Capacity | MMP                | Cytosolic<br>Ca <sup>2+</sup> | Cell size          |
|-----------------------------------|--------------------------------------------|----------------------|------------------------|--------------------|------------------------------------------------|----------------------------------|--------------------|-------------------------------|--------------------|
| Spearman r                        | -0.422                                     | -0.321               | -0.640                 | -0.309             | -0.33                                          | -0.553                           | 0.222              | 0.416                         | -0.0771            |
| 95%<br>confidence<br>interval     | -0,775 to<br>0,132                         | -0,724 to<br>0,245   | -0,872 to -<br>0,175   | -0,717 to<br>0,258 | -0,728 to<br>0,235                             | -0,835 to -<br>0,0394            | -0,342 to<br>0,669 | -0,139 to<br>0,772            | -0,567 to<br>0,453 |
| P (two-<br>tailed)                | 0.1184                                     | 0.2416               | 0.0118                 | 0.2613             | 0.2282                                         | 0.0349                           | 0.4226             | 0.1235                        | 0.7848             |
| P value<br>summary                | ns                                         | ns                   | *                      | ns                 | ns                                             | *                                | ns                 | ns                            | ns                 |
| Significant?<br>(alpha =<br>0.05) | No                                         | No                   | Yes                    | No                 | No                                             | Yes                              | No                 | No                            | No                 |

**Table S3. Neural progenitor cells markers PAX6 and SOX2**

|                  | DAPI | SOX2 | % SOX2 | PAX6 | % PAX6 |
|------------------|------|------|--------|------|--------|
| <b>Ctl 17 #1</b> | 112  | 97   | 86.6   | 106  | 94.6   |
| <b>Ctl 17 #2</b> | 88   | 82   | 93.2   | 83   | 94.3   |
| <b>Ctl 17 #3</b> | 101  | 93   | 92.1   | 97   | 96.0   |
| <b>Ctl 17 #4</b> | 301  | 272  | 90.4   | 286  | 95.0   |
| <b>Total</b>     | 602  | 544  | 90.4   | 572  | 95.0   |
| <b>Non-R #1</b>  | 88   | 78   | 88.6   | 81   | 92.0   |
| <b>Non-R #2</b>  | 101  | 94   | 93.1   | 94   | 93.1   |
| <b>Non-R #3</b>  | 87   | 79   | 90.8   | 84   | 96.6   |
| <b>Total</b>     | 878  | 795  | 90.5   | 831  | 94.6   |
| <b>Ctl 18 #1</b> | 88   | 77   | 87.5   | 84   | 95.5   |
| <b>Ctl 18 #2</b> | 96   | 88   | 91.7   | 91   | 94.8   |
| <b>Ctl 18 #3</b> | 101  | 94   | 93.1   | 97   | 96.0   |
| <b>Ctl 18 #4</b> | 285  | 259  | 90.9   | 272  | 95.4   |
| <b>Total</b>     | 570  | 518  | 90.9   | 544  | 95.4   |
| <b>Mito #1</b>   | 81   | 74   | 91.4   | 76   | 93.8   |
| <b>Mito #2</b>   | 89   | 85   | 95.5   | 88   | 98.9   |
| <b>Mito #3</b>   | 80   | 75   | 93.8   | 77   | 96.3   |
| <b>Mito #4</b>   | 101  | 94   | 93.1   | 96   | 95.0   |
| <b>Total</b>     | 351  | 328  | 93.4   | 337  | 96.0   |

**Table S4. Mitochondrial bioenergetics in neural progenitor cells (NPCs)**

|                                                           | Ctl                 | MDD                 | Ctl 17             | Non-R              | Ctl 18             | Mito               |
|-----------------------------------------------------------|---------------------|---------------------|--------------------|--------------------|--------------------|--------------------|
| <b>Basal respiration</b><br>(pmol/min/1000cells)          | 7.61±0.28<br>n=63   | 6.76±0.23<br>n=70   | 5.75±0.28<br>n=9   | 7.63±0.47<br>n=9   | 5.64±0.35<br>n=8   | 5.13±0.12<br>n=8   |
|                                                           | p=0.0008            |                     | p=0.0143           |                    | p=0.1133           |                    |
| <b>Maximal respiration</b><br>(pmol/min/1000cells)        | 11.1±0.44<br>n=63   | 9.71±0.39<br>n=70   | 9.67±0.49<br>n=9   | 12.6±0.92<br>n=9   | 10.7±0.92<br>n=8   | 8.96±0.39<br>n=8   |
|                                                           | p=0.0001            |                     | p=0.0197           |                    | p=0.0354           |                    |
| <b>Proton leak</b><br>(pmol/min/1000cells)                | 1.77±0.08<br>n=63   | 1.48±0.05<br>n=70   | 1.14±0.06<br>n=9   | 1.48±0.13<br>n=9   | 1.33±0.06<br>n=8   | 1.20±0.08<br>n=8   |
|                                                           | p=0.0007            |                     | p=0.0329           |                    | p=0.3496           |                    |
| <b>ATP-related O2 consumption</b><br>(pmol/min/1000cells) | 6.67±0.33<br>n=63   | 5.31±0.19<br>n=70   | 4.61±0.24<br>n=9   | 6.14±0.35<br>n=9   | 4.31±0.33<br>n=8   | 3.93±0.11<br>n=8   |
|                                                           | p<0.0001            |                     | p=0.0143           |                    | p=0.0903           |                    |
| <b>Spare respiratory capacity</b><br>(pmol/min/1000cells) | 3.73±0.27<br>n=63   | 3.00±0.22<br>n=70   | 3.92±0.25<br>n=9   | 4.93±0.59<br>n=9   | 5.02±0.73<br>n=8   | 3.84±0.30<br>n=8   |
|                                                           | p=0.0055            |                     | p=0.1210           |                    | p=0.0403           |                    |
| <b>Non-mito. O2 consumption</b><br>(pmol/min/1000cells)   | 3.45±0.13<br>n=63   | 3.01±0.11<br>n=70   | 2.19±0.13<br>n=9   | 2.36±0.16<br>n=9   | 2.32±0.12<br>n=8   | 2.00±0.15<br>n=8   |
|                                                           | p=0.0007            |                     | p=0.2530           |                    | p=0.0619           |                    |
| <b>ATP content</b><br>(nM/μg/mL)                          |                     |                     | 25.7±1.54<br>n=6   | 24.1±2.11<br>n=6   | 22.6±2.15<br>n=6   | 24.9±1.61<br>n=6   |
|                                                           |                     |                     | p=0.5912           |                    | p=0.1331           |                    |
| <b>NAD/NADH</b><br>(ratio)                                |                     |                     | 4.67±0.25<br>n=3   | 5.33±0.29<br>n=3   | 4.64±0.24<br>n=3   | 5.65±0.16<br>n=3   |
|                                                           |                     |                     | p=0.2374           |                    | p=0.0288           |                    |
| <b>Mitochondrial content</b><br>(mean fluo.)              |                     |                     | 21792±3230<br>n=9  | 18292±3811<br>n=9  | 20847±3802<br>n=6  | 22812±4514<br>n=6  |
|                                                           |                     |                     | p=0.3030           |                    | p=0.2756           |                    |
| <b>MMP</b><br>(relative units)                            | 2.42±0.01<br>n=7118 | 2.17±0.01<br>n=7120 | 3.22±0.09<br>n=300 | 3.22±0.08<br>n=296 | 2.38±0.08<br>n=300 | 3.33±0.09<br>n=298 |
|                                                           | p=0.148             |                     | p=0.9207           |                    | p<0.0001           |                    |
| <b>Cytosolic Ca2+</b><br>(relative units)                 | 0.56±0.01<br>n=4700 | 0.57±0.01<br>n=4706 | 0.63±0.01<br>n=492 | 0.62±0.02<br>n=457 | 0.64±0.02<br>n=501 | 0.65±0.02<br>n=513 |
|                                                           | p=0.041             |                     | p=0.2137           |                    | p=0.0001           |                    |
| <b>Mito. Ca2+</b><br>(relative units)                     |                     |                     | 372.4±4.2<br>n=420 | 487.3±5.6<br>n=452 | 512.3±6.3<br>n=551 | 444.2±4.3<br>n=534 |
|                                                           |                     |                     | p<0.0001           |                    | p<0.0001           |                    |
| <b>Cell size</b><br>(pixels)                              | 190±1.2<br>n=2866   | 165±1.1<br>n=2844   | 274±4.8<br>n=491   | 243±3.4<br>n=455   | 261±3.5<br>n=500   | 221±3.0<br>n=523   |
|                                                           | p<0.0001            |                     | p<0.0001           |                    | p<0.0001           |                    |

|                                                        |  |                        |                               |                            |                            |
|--------------------------------------------------------|--|------------------------|-------------------------------|----------------------------|----------------------------|
| Cytosolic ROS<br>(mean fluo.)                          |  | 1223±184<br>n=8        | 1559±283<br>n=8               | 1220±192<br>n=5            | 1414±140<br>n=5            |
|                                                        |  | p=0.3286               |                               | p=0.1765                   |                            |
| Mitochondrial ROS<br>(mean fluo.)                      |  | 301±34<br>n=8          | 267±31<br>n=8                 | 327±31<br>n=5              | 554±51<br>n=5              |
|                                                        |  | p=0.4287               |                               | p=0.0036                   |                            |
| Lipid peroxidation<br>(pg/mL 8-isoprostane/1000 cells) |  | 0.00233±0.00012<br>n=6 | 0.000942±8.5<br>0e-005<br>n=6 | 0.00107±0.0001<br>1<br>n=6 | 0.00180±0.000<br>27<br>n=6 |
|                                                        |  | p=0.0002               |                               | p=0.0186                   |                            |

**Table S5. Patients and controls information – Astrocytes cohort**

|                          | <b>Ctl 5</b>                                                                                             | <b>MDD 5</b>                                                                          | <b>Ctl 10</b>                                                                                            | <b>MDD 10</b>                                                | <b>Ctl 11</b>                                                                                            | <b>MDD 11</b>                                                |
|--------------------------|----------------------------------------------------------------------------------------------------------|---------------------------------------------------------------------------------------|----------------------------------------------------------------------------------------------------------|--------------------------------------------------------------|----------------------------------------------------------------------------------------------------------|--------------------------------------------------------------|
| <b>Age (years)</b>       | 24                                                                                                       | 18                                                                                    | 20                                                                                                       | 21                                                           | 23                                                                                                       | 23                                                           |
| <b>Sex</b>               | Male                                                                                                     | Male                                                                                  | Male                                                                                                     | Male                                                         | Male                                                                                                     | Male                                                         |
| <b>Clinical findings</b> | Absence of past or present depressive or mental disorders<br><br>Absence of documented health conditions | Recurrent depressive disorder, current episode severe with psychotic symptoms (F33.3) | Absence of past or present depressive or mental disorders<br><br>Absence of documented health conditions | Severe depressive episode without psychotic symptoms (F32.2) | Absence of past or present depressive or mental disorders<br><br>Absence of documented health conditions | Severe depressive episode without psychotic symptoms (F32.2) |
| <b>Treatment</b>         | None                                                                                                     | Bupropion, Mirtazapin                                                                 | None                                                                                                     | Valdoxan                                                     | None                                                                                                     | Cipralex                                                     |

**Table S6. Mitochondrial bioenergetics in astrocytes**

|                                                           | Ctl                | MDD                  | Ctl 17             | Non-R              | Ctl 18             | Mito               |
|-----------------------------------------------------------|--------------------|----------------------|--------------------|--------------------|--------------------|--------------------|
| <b>Basal respiration</b><br>(pmol/min/1000cells)          | 21.8±0.9<br>n=22   | 19.5±0.8<br>n=24     | 19.8±1.6<br>n=9    | 16.7±1.1<br>n=9    | 19.4±0.5<br>n=9    | 20.9±1.0<br>n=9    |
|                                                           | p=0.0024           |                      | p=0.0207           |                    | p=0.2087           |                    |
| <b>Maximal respiration</b><br>(pmol/min/1000cells)        | 39.6±1.9<br>n=19   | 37.4±1.8<br>n=22     | 41.2±4.3<br>n=9    | 29.9±2.8<br>n=9    | 45.3±2.4<br>n=9    | 44.1±1.8<br>n=9    |
|                                                           | p=0.0190           |                      | p=0.0018           |                    | p=0.6975           |                    |
| <b>Proton leak</b><br>(pmol/min/1000cells)                | 3.73±0.19<br>n=22  | 3.07±0.23<br>n=24    | 3.27±0.29<br>n=9   | 2.82±0.29<br>n=9   | 3.42±0.12<br>n=9   | 3.61±0.16<br>n=9   |
|                                                           | p=0.0119           |                      | p=0.0903           |                    | p=0.2257           |                    |
| <b>ATP-related O2 consumption</b><br>(pmol/min/1000cells) | 18.8±0.8<br>n=24   | 16.2±0.6<br>n=24     | 16.6±1.3<br>n=9    | 13.9±0.9<br>n=9    | 16.0±0.5<br>n=9    | 17.3±0.9<br>n=9    |
|                                                           | p=0.0033           |                      | p=0.0259           |                    | p=0.2153           |                    |
| <b>Spare respiratory capacity</b><br>(pmol/min/1000cells) | 18.22±1.2<br>n=20  | 18.6±1.0<br>n=24     | 21.4±2.9<br>n=9    | 13.2±1.9<br>n=9    | 24.1±1.0<br>n=8    | 23.2±1.5<br>n=9    |
|                                                           | p=0.5654           |                      | p=0.0007           |                    | p=0.3528           |                    |
| <b>Non-mito. O2 consumption</b><br>(pmol/min/1000cells)   | 7.78±0.43<br>n=22  | 6.28±0.33<br>n=24    | 7.72±0.62<br>n=9   | 6.80±0.16<br>n=9   | 6.17±0.33<br>n=9   | 5.86±0.49<br>n=9   |
|                                                           | p=0.0067           |                      | p=0.2284           |                    | p=0.4339           |                    |
| <b>ATP content</b><br>(nM/μg/mL)                          | 36.7±3.03<br>n=14  | 39.1±2.83<br>n=14    | 33.9±5.21<br>n=7   | 29.3±5.80<br>n=4   | 34.1±5.19<br>n=6   | 23.9±4.62<br>n=8   |
|                                                           | p=0.2442           |                      | p=0.1309           |                    | p=0.0486           |                    |
| <b>Mitochondrial content</b><br>(mean fluo.)              |                    |                      | 20454±3682<br>n=5  | 15794±1731<br>n=5  | 31306±5570<br>n=5  | 20573±4766<br>n=5  |
|                                                           |                    |                      | p=0.1248           |                    | p=0.1168           |                    |
| <b>MMP</b><br>(relative units)                            | 4.14±0.07<br>n=888 | 3.23±0.05<br>n=1196  | 2.59±0.05<br>n=382 | 3.69±0.07<br>n=382 | 1.97±0.07<br>n=240 | 1.29±0.03<br>n=240 |
|                                                           | p<0.0001           |                      | p<0.0001           |                    | p<0.0001           |                    |
| <b>Cytosolic Ca2+</b><br>(relative units)                 | 0.54±0.00<br>n=575 | 0.5324±0.00<br>n=709 | 0.60±0.00<br>n=343 | 0.67±0.00<br>n=378 | 0.57±0.00<br>n=223 | 0.58±0.00<br>n=235 |
|                                                           | p=0.0009           |                      | p<0.0001           |                    | p=0.0018           |                    |
| <b>Mito. Ca2+</b><br>(relative units)                     | 201±2<br>n=550     | 177±1<br>n=693       | 361±7<br>n=341     | 316±5<br>n=373     | 268±3<br>n=228     | 246±2<br>n=235     |
|                                                           | p<0.0001           |                      | p<0.0001           |                    | p<0.0001           |                    |
| <b>Cell size</b><br>(pixels)                              | 1110±27<br>n=448   | 945±21<br>n=469      | 1288±39<br>n=223   | 1130±30<br>n=270   | 1377±48<br>n=159   | 1538±48<br>n=160   |
|                                                           | p<0.0001           |                      | p<0.0001           |                    | p=0.0061           |                    |

|                                   |  |                 |                 |                 |                 |
|-----------------------------------|--|-----------------|-----------------|-----------------|-----------------|
| Cytosolic ROS<br>(mean fluo.)     |  | 4027±518<br>n=5 | 2496±100<br>n=5 | 2622±75<br>n=5  | 3561±340<br>n=5 |
|                                   |  | p=0.0359        |                 | p=0.0120        |                 |
| Mitochondrial ROS<br>(mean fluo.) |  | 1697±285<br>n=5 | 1378±176<br>n=5 | 1714±367<br>n=5 | 1729±371<br>n=5 |
|                                   |  | p=0.3620        |                 | p=0.7621        |                 |



**Table S7. Mitochondrial membrane potential (MMP), calcium homeostasis and dynamics in neurons**

|                                                          | Ctl 17              | Non-R               | Ctl 18              | Mito                |
|----------------------------------------------------------|---------------------|---------------------|---------------------|---------------------|
| <b>MMP somas</b><br>(relative units)                     | 1.20±0.03<br>n=342  | 0.895±0.01<br>n=771 | 1.08±0.01<br>n=865  | 1.15±0.02<br>n=1075 |
|                                                          | p<0.0001            |                     | p=0.0002            |                     |
| <b>MMP neurites</b><br>(relative units)                  | 6.89±0.32<br>n=166  | 6.31±0.31<br>n=156  | 5.35±0.19<br>n=155  | 8.87±0.22<br>n=201  |
|                                                          | p=0.3834            |                     | p<0.0001            |                     |
| <b>Cytosolic calcium</b><br>(relative units)             | 0.928±0.01<br>n=372 | 0.763±0.01<br>n=302 | 0.797±0.01<br>n=837 | 0.736±0.01<br>n=661 |
|                                                          | p<0.0001            |                     | p<0.0001            |                     |
| <b>Mitochondrial calcium</b><br>(relative units)         | 344±6<br>n=453      | 354±7<br>n=359      | 449±6<br>n=449      | 316±4<br>n=493      |
|                                                          | p=0.2800            |                     | p<0.0001            |                     |
| <b>Cell size</b><br>(pixels)                             | 131±2<br>n=374      | 132±3<br>n=291      | 109±1<br>n=938      | 107±1<br>n=670      |
|                                                          | p=0.5262            |                     | p=0.0117            |                     |
| <b>Calcium transients amplitude</b><br>(relative units)  | 0.26±0.00<br>n=952  | 0.26±0.01<br>n=156  | 0.24±0.00<br>n=1189 | 0.23±0.00<br>n=1255 |
|                                                          | p=0.0015            |                     | p=0.0843            |                     |
| <b>Calcium transients rise time</b><br>(ms)              | 3.02±0.05<br>n=948  | 3.25±0.15<br>n=148  | 2.39±0.04<br>n=1056 | 3.03±0.05<br>n=1252 |
|                                                          | p=0.0048            |                     | p<0.0001            |                     |
| <b>Calcium transients time constant of decay</b><br>(ms) | 6.74±0.14<br>n=736  | 9.95±0.90<br>n=115  | 5.49±0.08<br>n=961  | 12.0±0.26<br>n=994  |
|                                                          | p<0.0001            |                     | p<0.0001            |                     |

**Table S8. Electrophysiological properties of patients-derived neurons**

|                                                                | Ctl                 | MDD                 | Ctl 17              | Non-R               | Ctl 18              | Mito                |
|----------------------------------------------------------------|---------------------|---------------------|---------------------|---------------------|---------------------|---------------------|
| <b>RMP</b><br>(mV)                                             | -26.7±1.02<br>n=161 | -23.7±0.84<br>n=170 | -47.9±2.14<br>n=55  | -56.0±1.71<br>n=48  | -53.1±1.36<br>n=74  | -48.4±1.68<br>n=68  |
|                                                                | p=0.0278            |                     | p=0.0024            |                     | p=0.0428            |                     |
| <b>Capacitance</b><br>(pF)                                     | 18.1±0.9<br>n=161   | 15.8±0.8<br>n=169   | 12.8±0.4<br>n=56    | 9.2±0.4<br>n=49     | 11.4±0.4<br>n=75    | 9.7±0.3<br>n=67     |
|                                                                | p=0.0330            |                     | p<0.0001            |                     | p=0.0065            |                     |
| <b>INa 0mV</b><br><b>current</b><br><b>density</b><br>(pA/pF)  | -33.0±2.5<br>n=157  | -42.6±3.2<br>n=163  | -17.6±3.1<br>n=47   | -9.7±2.5<br>n=43    | -11.7±1.6<br>n=60   | -31.2±3.1<br>n=58   |
|                                                                | p=0.0116            |                     | p=0.4348            |                     | p<0.0001            |                     |
| <b>IK +20mV</b><br><b>current</b><br><b>density</b><br>(pA/pF) | 41.4±1.9<br>n=226   | 38.2±1.6<br>n=245   | 102±5.4<br>n=50     | 123±7.3<br>n=43     | 91.2±5.7<br>n=65    | 118±5.9<br>n=61     |
|                                                                | p=0.2956            |                     | p=0.0254            |                     | p=0.0015            |                     |
| <b>Spontaneous</b><br><b>PSCs</b><br>(act./not act.)           |                     |                     | 26/32=81.25%        | 6/35=17.14%         | 23/41=56.10%        | 33/46=71.74%        |
|                                                                |                     |                     | p<0.0001            |                     | p=0.1786            |                     |
| <b># of PSCs</b><br>(mean<br>number)                           |                     |                     | 106±17.7<br>n=26    | 8.5±2.48<br>n=6     | 23.0±6.2<br>n=23    | 30.5±5.7<br>n=33    |
|                                                                |                     |                     | p<0.0001            |                     | p=0.4214            |                     |
| <b>Spontaneous</b><br><b>AP -50mV</b><br>(act./not act.)       | 18/162=11.11%       | 35/163=21.74%       | 19/24=79.14%        | 16/32=50%           | 17/35=77.14%        | 29/38=76.32%        |
|                                                                | p=0.016             |                     | p=0.0301            |                     | p=0.0170            |                     |
| <b># of AP</b><br><b>-50mV</b><br>(mean<br>number)             |                     |                     | 63.2±15.9<br>n=19   | 12.9±2.09<br>n=16   | 34.4±9.18<br>n=17   | 63.2±13.8<br>n=29   |
|                                                                |                     |                     | p=0.0240            |                     | p=0.0803            |                     |
| <b>Spontaneous</b><br><b>AP -80mV</b><br>(act./not act.)       |                     |                     | 21/24=87.50%        | 20/34=58.82%        | 19/36=52.78%        | 27/41=65.85%        |
|                                                                |                     |                     | p=0.0216            |                     | p=0.2563            |                     |
| <b># of AP</b><br><b>-80mV</b><br>(mean<br>number)             |                     |                     | 20.1±5.58<br>n=21   | 12.4±2.4<br>n=20    | 23.8±6.83<br>n=19   | 34.5±8.92<br>n=27   |
|                                                                |                     |                     | p=0.4184            |                     | p=0.7273            |                     |
| <b>Max</b><br><b>amplitude</b><br><b>spont. AP</b><br>(mV)     |                     |                     | -8.09±0.58<br>n=314 | -9.54±0.77<br>n=127 | -10.3±0.48<br>n=283 | -4.11±0.38<br>n=779 |
|                                                                |                     |                     | p<0.0001            |                     | p<0.0001            |                     |

|                                          |  |                      |                     |                     |                     |
|------------------------------------------|--|----------------------|---------------------|---------------------|---------------------|
| Spont. AP<br>FWHM<br>(ms)                |  | 5.94±0.14<br>n=247   | 5.22±0.14<br>n=124  | 6.09±0.13<br>n=234  | 5.25±0.07<br>n=738  |
|                                          |  | p<0.0001             |                     | p<0.0001            |                     |
| PSC<br>amplitude<br>(pA)                 |  | -59.4±0.54<br>n=2045 | -121.2±16.5<br>n=54 | -55.9±0.9<br>n=634  | -39.5±0.6<br>n=353  |
|                                          |  | p=0.006              |                     | p<0.0001            |                     |
| PSC rise<br>time<br>(ms)                 |  | 0.432±0.00<br>n=1994 | 0.469±0.01<br>n=50  | 0.462±0.01<br>n=691 | 0.765±0.02<br>n=372 |
|                                          |  | p=0.025              |                     | p<0.0001            |                     |
| PSC time<br>constant of<br>decay<br>(ms) |  | 1.23±0.01<br>n=1866  | 1.07±0.07<br>n=49   | 1.22±0.02<br>n=630  | 2.27±0.07<br>n=337  |
|                                          |  | p=0.7987             |                     | p<0.0001            |                     |
